# Supplementary material
Source: PubMed Central journal article supplement (PMC4808396)
Supplement: NIHMS754884-supplement-Supplimental_data.pdf [file NIHMS754884-supplement-Supplimental_data.pdf]

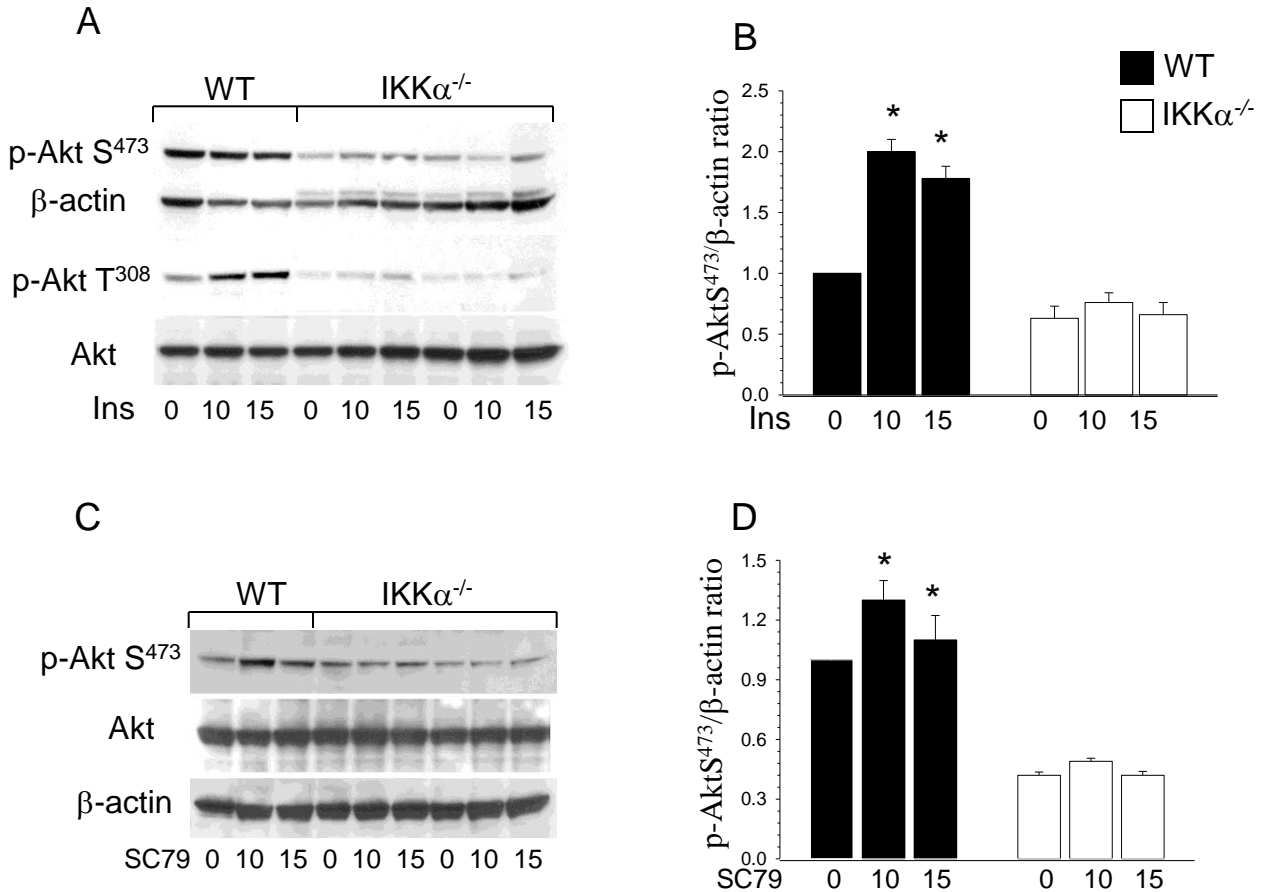

**Supplemental Figure I. Akt S<sup>473</sup> phosphorylation is suppressed in IKK $\alpha^{-/-}$  macrophages compared to WT cells in response to insulin (A,B) or Akt activator, SC79 (C,D).**

Peritoneal macrophages were incubated in serum free media for 16 hours and then treated with insulin (100 nM ; A,B) or Akt activator, SC79 (4  $\mu$ g/mL; C,D) for the indicated time. Cell protein extract (60 mg/well) was resolved and analyzed by Western blot using indicated antibodies. Graphs represent data (mean  $\pm$  SEM) of three (A,B) and two (C,D) experiments (\* $p$  < 0.05 compared to control untreated group).

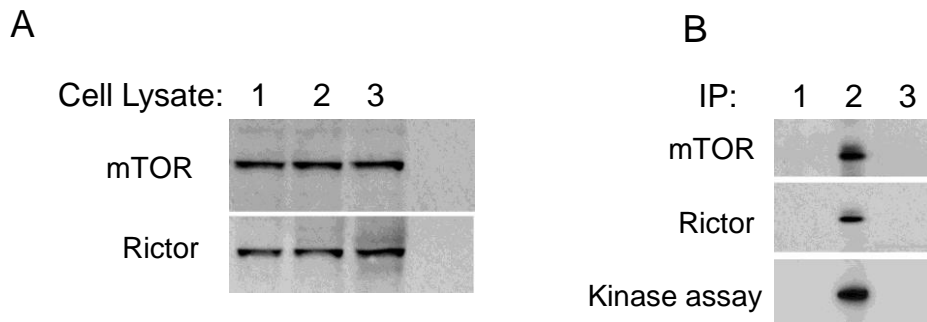

**Supplemental Figure II. Loss of  $IKK\alpha$  in macrophages prevents the precipitation of mTOR complex by antibody to IKKalpha**

Cell lysate (A) and precipitates isolated from  $IKK\alpha^{-/-}$  peritoneal macrophages were resolved by electrophoresis and incubated with isotype control (1), antibody to Rictor (2), or antibody to  $IKK\alpha$  (3); kinase activity detected by antibodies to p-Akt ( $S^{473}$ ) and in the presence of full-length Akt1 protein as the substrate.

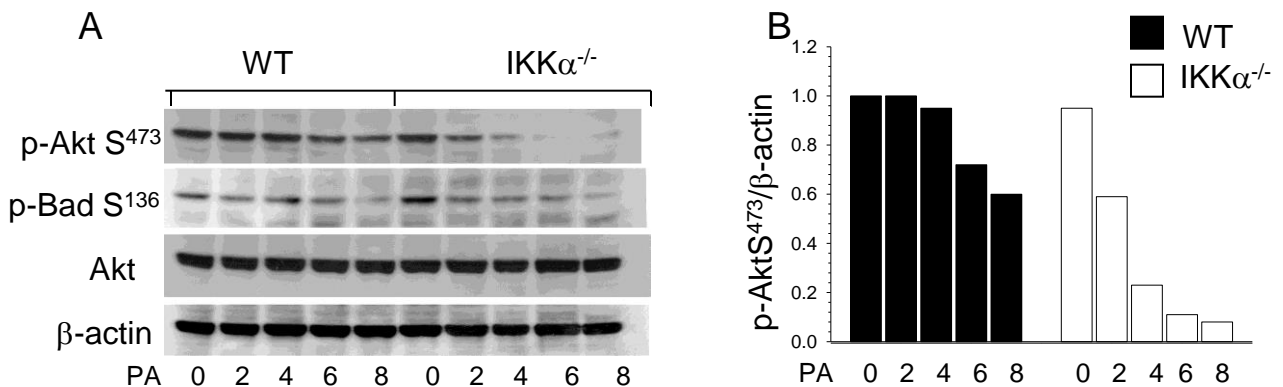

**Supplemental Figure III.  $IKK\alpha^{-/-}$  macrophages are more sensitive to lipotoxic treatment with PA-BSA, which induces ER stress resulting in suppression of Akt and Bad signaling more than in WT cells.**

Peritoneal macrophages were treated with 0.5mM PA-BSA for 0 (control), 1, 3, 6 and 8 hours. Cell protein extract (60 $\mu$ g/well) was resolved and analyzed by Western blot using indicated antibodies (A). B. Ratio of p-Akt  $S^{473}$ / $\beta$ -actin in WT and  $IKK\alpha^{-/-}$  macrophages.

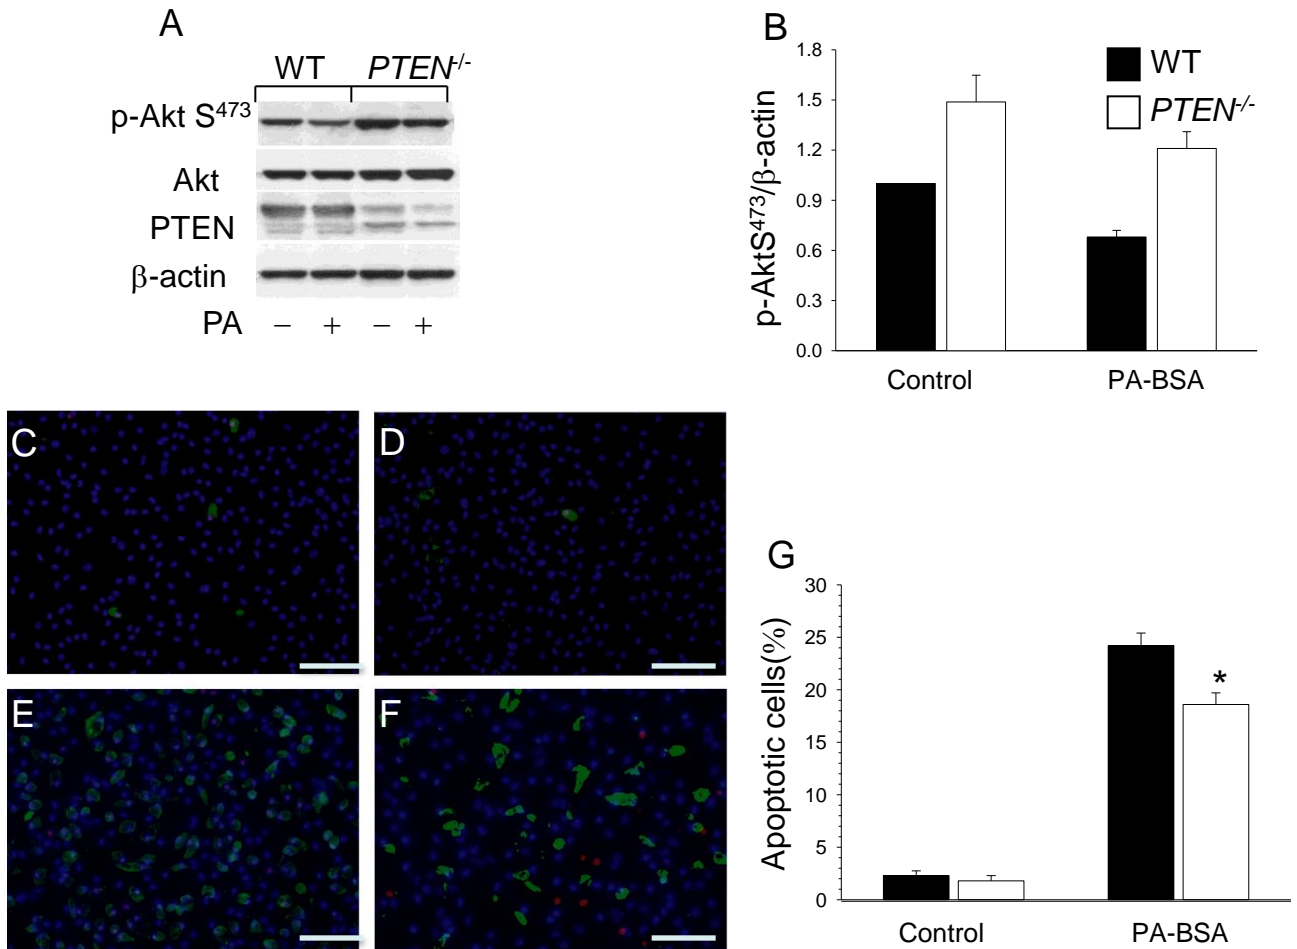

**Supplemental Figure IV. Akt signaling and apoptosis in WT and *PTEN*<sup>-/-</sup> peritoneal macrophages treated with BSA and PA-BSA.**

WT and *PTEN*<sup>-/-</sup> peritoneal macrophages were treated with BSA (control) or 0.5M PA-BSA for 3 (A,B) or 24 hours (C-G); WT and *PTEN*<sup>-/-</sup> macrophage proteins were analyzed by Western blot (A) and the ratio of p-AktS<sup>473</sup>/ $\beta$ -actin was measured (B) or cells were stained by the Alexa Flour 488 Annexin V/Dead cell apoptosis kit (C-F); Note Annexin V revealed apoptotic cells (green), propidium iodide detected dead cells (red) and DAPI stained nuclei (blue) in WT and *PTEN*<sup>-/-</sup> macrophages treated with BSA (C,D) and PA-BSA (E,F, respectively); scale bar represents 50 $\mu$ m. G. Percent of apoptotic cells in WT and *PTEN*<sup>-/-</sup> macrophages (\**p* < 0.05 vs. WT cell by Mann-Whitney Rank Sum Test).

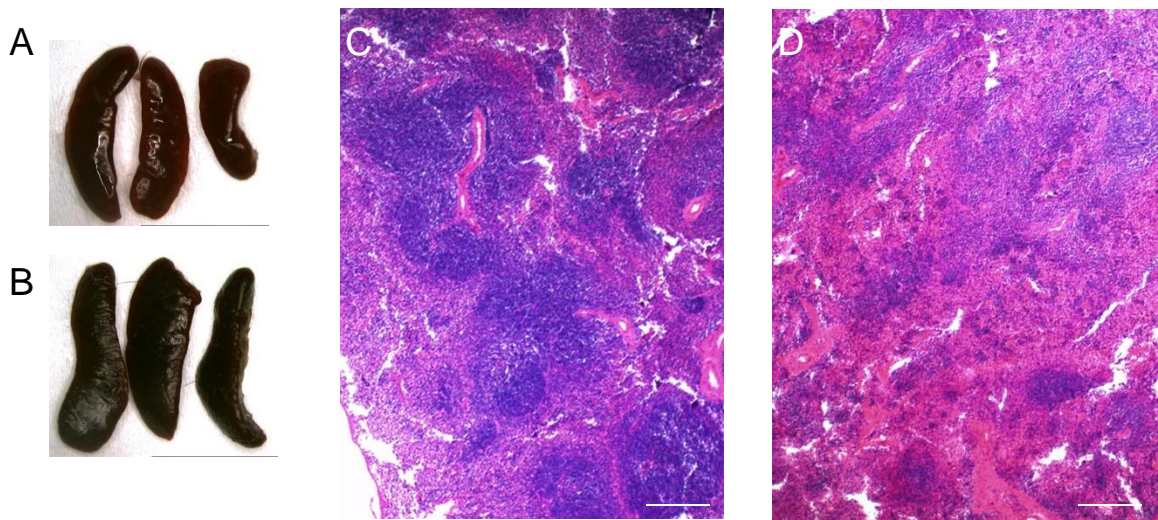

Supplemental Figure V. **Spleen enlargement (B) and altered spleen histology (D) in  $LDLR^{-/-}$  mice transplanted with  $IKK\alpha^{-/-}$  (B,D) marrow compared to control mice with WT marrow (A,C).** Paraffin sections (C,D) stained with hematoxylin-eosin. Scale bar indicates 200  $\mu\text{m}$ .

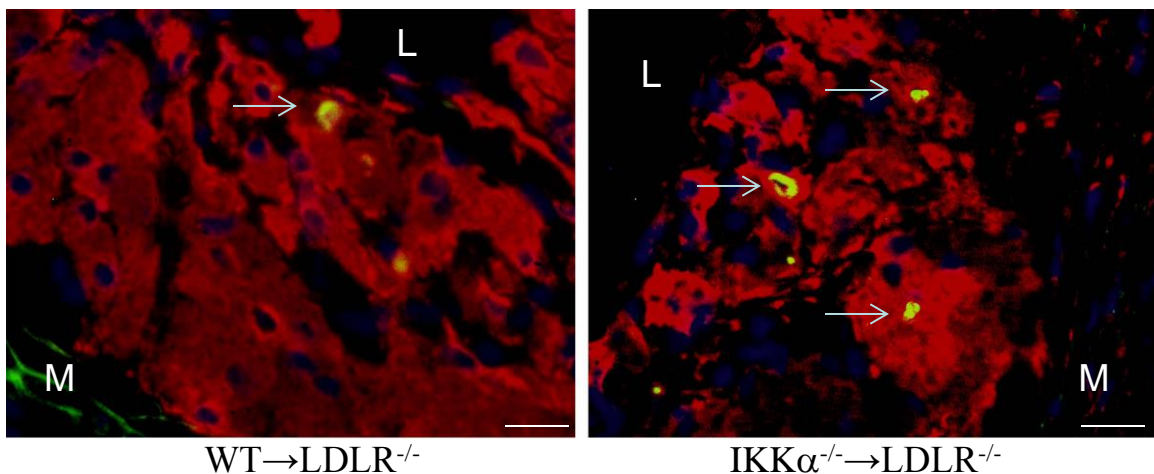

Supplemental Figure VI. **Apoptotic cells in atherosclerotic lesions of  $LDLR^{-/-}$  mice transplanted with WT or  $IKK\alpha^{-/-}$  FLC after 8 weeks of the Western diet.** Double staining of sections from aortic sinus with rat antibody to macrophage, MOMA-2 (red) and rabbit anti-cleaved caspase 3 (green) counterstaining with nuclear stain DAPI (blue) in atherosclerotic lesions of  $WT \rightarrow LDLR^{-/-}$  and  $IKK\alpha^{-/-} \rightarrow LDLR^{-/-}$  mice. Note co-localization of cleaved caspase 3 and MOMA-2 (yellow); Abbreviations: L- lumen, M – media; Scale bar indicates 50  $\mu\text{m}$ .

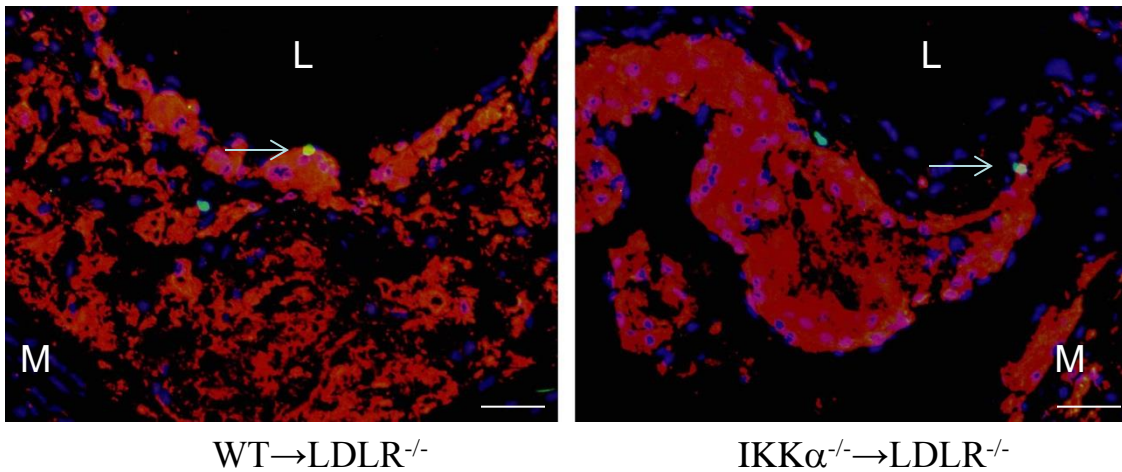

Supplemental Figure VII. **Detection of Ki-67 marker in atherosclerotic lesions of *LDLR*<sup>-/-</sup> mice reconstituted with WT or *IKKα*<sup>-/-</sup> FLC FLC after 8 weeks of the Western diet.**

Double staining of sections from aortic sinus with rat antibody to macrophages, MOMA-2 (red) and rabbit antibody to proliferative marker, Ki-67 (green), counterstaining with nuclear stain DAPI (blue) in atherosclerotic lesions of *WT*→*LDLR*<sup>-/-</sup> and *IKKα*<sup>-/-</sup>→*LDLR*<sup>-/-</sup> mice. Note co-localization of Ki-67 and MOMA-2 (yellow); Abbreviations: L- lumen, M – media; Scale bar indicates 50 μm.

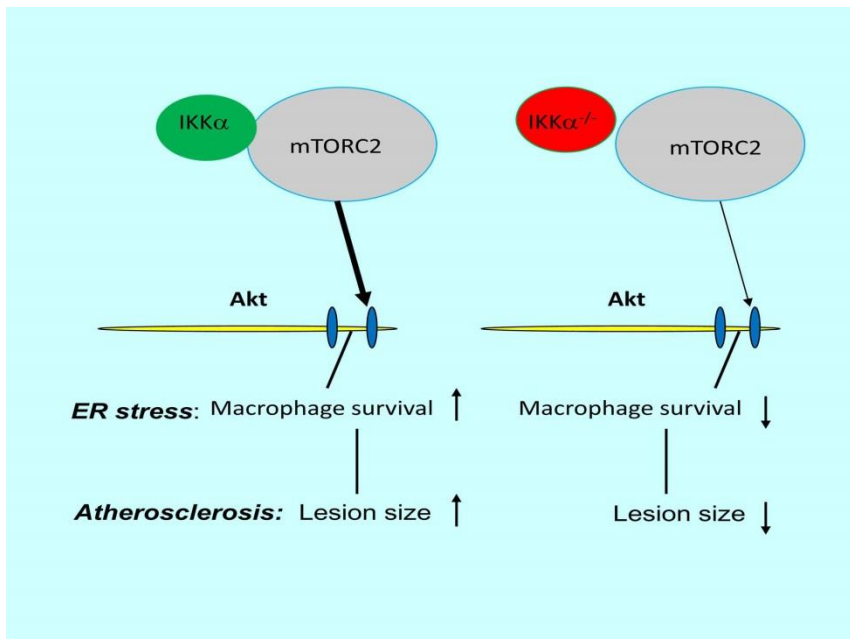

Supplemental Figure VIII. **A schematic presentation of the role of *IKKα* in mTORC2-mediated Akt signaling in mouse macrophage survival and atherosclerosis**

Supplemental Table I. **Body weight, total serum cholesterol and triglyceride levels in female and male *LDLR*<sup>-/-</sup> mice reconstituted with wild type or *IKK* $\alpha$ <sup>-/-</sup> fetal liver cells**

| Type of FLC reconstituted                                              | Body weight (grams)          | Cholesterol mg/dL          | Triglycerides mg/dL        |
|------------------------------------------------------------------------|------------------------------|----------------------------|----------------------------|
| <b>Females</b>                                                         |                              |                            |                            |
| WT→ <i>LDLR</i> <sup>-/-</sup> (n=11)                                  | 25.2 ± 0.5                   | 769 ± 22                   | 258 ± 31                   |
| <i>IKK</i> $\alpha$ <sup>-/-</sup> → <i>LDLR</i> <sup>-/-</sup> (n=10) | 24.9 ± 0.4<br><i>p</i> =0.67 | 779 ± 64<br><i>p</i> =0.59 | 248 ± 32<br><i>p</i> =0.80 |
| <b>Males</b>                                                           |                              |                            |                            |
| WT→ <i>LDLR</i> <sup>-/-</sup> (n=9)                                   | 23.6 ± 0.5                   | 701 ± 34                   | 176 ± 16                   |
| <i>IKK</i> $\alpha$ <sup>-/-</sup> → <i>LDLR</i> <sup>-/-</sup> (n=7)  | 24.7 ± 0.5<br><i>p</i> =0.46 | 637 ± 41<br><i>p</i> =0.26 | 167 ± 16<br><i>p</i> =0.32 |

Values are in mg/dl (mean ± SEM). The number of recipient mice in each group is indicated by *n*. The differences are not statistically significant between the groups.
